# Supplementary material
Source: PubMed Central journal article supplement (PMC5907508)
Supplement: NIHMS941721-supplement-Supplemental_2.pdf [file NIHMS941721-supplement-Supplemental_2.pdf]

## Basin-wide Impacts of Climate Change on Ecosystem Services in the Lower Mekong Basin

### Ecological Research

Yongyut Trisurat<sup>1\*</sup>, Aekkapol Aekakkararungroj, Hwan-ok Ma, and John M. Johnston

<sup>1</sup>Faculty of Forestry, Kasetsart University, Bangkok 10900, Thailand

\*Corresponding authors: email fforyyt@ku.ac.th

**Table S1.** Observed and predicted annual rainfall derived from SimCLIM at selected weather stations (baseline 1986-2005)

| Stations           | Country  | Observed annual<br>rainfall<br>(mm) | Predicted annual<br>rainfall<br>(mm) |
|--------------------|----------|-------------------------------------|--------------------------------------|
| Stung Treng        | Cambodia | 1,768.10                            | 1,949.08                             |
| Siem Reap Kuktatry | Cambodia | 1,299.80                            | 1,489.15                             |
| Battambang         | Cambodia | 1,256.50                            | 1,296.83                             |
| Kampong Thom       | Cambodia | 1,527.10                            | 1,540.72                             |
| Pursat             | Cambodia | 1,348.60                            | 1,337.15                             |
| Kratie             | Cambodia | 1,667.70                            | 1,749.75                             |
| Kampong Cham       | Cambodia | 1,689.30                            | 1,448.09                             |
| Pochentong         | Cambodia | 1,319.40                            | 1,375.28                             |
| Oudomxai           | Laos     | 1,404.20                            | 1,419.01                             |
| Houayxay           | Laos     | 1,645.10                            | 1,873.72                             |
| Louangphabang      | Laos     | 1,297.20                            | 1,371.23                             |
| Pakxan             | Laos     | 2,956.90                            | 3,144.58                             |
| Thakhek            | Laos     | 2,323.30                            | 2,130.49                             |
| Xepon              | Laos     | 1,811.80                            | 1,958.47                             |
| Savannakhet        | Laos     | 1,414.50                            | 1,498.10                             |
| Khongxedon         | Laos     | 1,735.90                            | 1,878.35                             |
| Attapu             | Laos     | 2,486.00                            | 2,232.39                             |
| Nong Khai          | Thailand | 1,543.40                            | 1,565.93                             |
| Nakhon Phanom      | Thailand | 1,963.30                            | 2,346.89                             |
| Loei               | Thailand | 1,155.70                            | 1,224.09                             |
| Udon Thani         | Thailand | 1,407.90                            | 1,404.56                             |
| Sakon Nakhon       | Thailand | 1,526.10                            | 1,636.11                             |
| Mukdahan           | Thailand | 1,418.50                            | 1,476.27                             |
| Roi Et             | Thailand | 1,399.40                            | 1,318.19                             |
| Chaiyaphum         | Thailand | 1,097.80                            | 1,080.22                             |
| Ubon               | Thailand | 1,558.40                            | 1,551.97                             |
| Tha Tum            | Thailand | 1,224.80                            | 1,372.80                             |
| Surin              | Thailand | 1,264.00                            | 1,399.00                             |
| Nakhon Ratchasima  | Thailand | 1,257.10                            | 1,031.60                             |
| Aranyaprathet      | Thailand | 1,391.40                            | 1,311.11                             |

Note: Nash-Sutcliffe efficiency coefficient (NSE) = 0.87; Root-mean-square error (RMSE) = 0.89
