# Supplementary material
Source: PubMed Central journal article supplement (PMC5907508)
Supplement: NIHMS941721-supplement-Supplemental_3.pdf [file NIHMS941721-supplement-Supplemental_3.pdf]

## Basin-wide Impacts of Climate Change on Ecosystem Services in the Lower Mekong Basin

### Ecological Research

Yongyut Trisurat<sup>1\*</sup>, Aekkapol Aekakkararungroj, Hwan-ok Ma, and John M. Johnston

<sup>1</sup>Faculty of Forestry, Kasetsart University, Bangkok 10900, Thailand

\*Corresponding authors: email fforyyt@ku.ac.th

**Table S2.** Observed and predicted water yields in selected subwatersheds

| Station           | Country  | Area (km <sup>2</sup> ) <sup>1</sup> | Observed water yield (million m <sup>3</sup> ) | Predicted water yield (million m <sup>3</sup> ) |
|-------------------|----------|--------------------------------------|------------------------------------------------|-------------------------------------------------|
| Chulaporn         | Thailand | 554                                  | 136.05                                         | 133.15                                          |
| Lamsae            | Thailand | 601                                  | 233.58                                         | 248.43                                          |
| Nangrong          | Thailand | 466                                  | 150.82                                         | 174.54                                          |
| Upper Mun         | Thailand | 452                                  | 158.54                                         | 190.84                                          |
| Nampung           | Thailand | 299                                  | 185.72                                         | 196.41                                          |
| Muong Kasi        | Lao PDR  | 389                                  | 528.19                                         | 471.60                                          |
| Vang Vieng        | Lao PDR  | 832                                  | 1,014.80                                       | 1,238.60                                        |
| Muong Mai         | Lao PDR  | 4,357                                | 6,383.70                                       | 5,101.20                                        |
| Ban Signo         | Lao PDR  | 3,453                                | 6,499.40                                       | 5,207.70                                        |
| Highway Bridge    | Lao PDR  | 619                                  | 660.00                                         | 699.10                                          |
| Saravanne         | Lao PDR  | 1,117                                | 1,281.60                                       | 1,384.50                                        |
| Attopeu           | Lao PDR  | 9,638                                | 12,701.10                                      | 1,996.10                                        |
| Kontum            | Vietnam  | 2,960                                | 3,187.90                                       | 3,882.70                                        |
| Cau 14 (Buon Bur) | Vietnam  | 8,401                                | 7,679.40                                       | 7,247.90                                        |
| Andaung Meas      | Cambodia | 28,678                               | 49,797.80                                      | 54,726.90                                       |
| Peam Khley        | Cambodia | 1,268                                | 1,679.50                                       | 1,311.80                                        |

Note: <sup>1</sup> Calculated by ArcGIS hydrology tool; Nash-Sutcliffe efficiency coefficient (NSE) = 0.94; Root-mean-square error (RMSE) = 0.95
